1 **TITLE:** Trained-feature specific offline learning in an orientation detection task

2

3 **RUNNING TITLE:** Sleep enhances trained-feature specific learning

4

5 **AUTHORS:**

6 Masako Tamaki (tamaki@brown.edu), Zhiyan Wang (zhiyan\_wang@brown.edu), Takeo

7 Watanabe (takeo\_watanabe@brown.edu), Yuka Sasaki (yuka\_sasaki@brown.edu)\*

8 \*Corresponding Author

9

10 **AFFILIATION:**

11 Department of Cognitive, Linguistic, and Psychological Sciences, Brown University, Box 1821,

12 190 Thayer Street, Providence, RI, 02912, USA. TEL: 401-863-2727

13

14 **CORRESPONDING AUTHOR: Yuka Sasaki**

15 Department of Cognitive, Linguistic, and Psychological Sciences, Brown University, Box 1821,

16 190 Thayer Street, Providence, RI, 02912, USA. TEL: 401-863-2727

17 Email: yuka\_sasaki@brown.edu

18

19 **ABSTRACT:**

20 It has been suggested that sleep provides additional enhancement of visual perceptual learning

21 (VPL) acquired before sleep, termed offline performance gains. A majority of the studies that

22 found offline performance gains of VPL used discrimination tasks including the texture

23 discrimination task (TDT). This makes it questionable whether offline performance gains on

24 VPL are generalized to other visual tasks. The present study examined whether a Gabor

25 orientation detection task, which is a standard task in VPL, shows offline performance gains. In

26 Experiment 1, we investigated whether sleep leads to offline performance gains on the task.

27 Subjects were trained with the Gabor orientation detection task, and re-tested it after a 12-hr

28 interval that included either nightly sleep or only wakefulness. We found that performance on the

29 task improved to a significantly greater degree after the interval that included sleep and

30 wakefulness than the interval including wakefulness alone. In addition, offline performance

31 gains were specific to the trained orientation. In Experiment 2, we tested whether offline

32 performance gains occur by a nap. Also, we tested whether spontaneous sigma activity in early  
33 visual areas during non-rapid eye movement (NREM) sleep, previously implicated in offline  
34 performance gains of TDT, was associated with offline performance gains of the task. A  
35 different group of subjects had a nap with polysomnography. The subjects were trained with the  
36 task before the nap and re-tested after the nap. The performance of the task improved  
37 significantly after the nap only on the trained orientation. Sigma activity in the trained region of  
38 early visual areas during NREM sleep was significantly larger than in the untrained region, in  
39 correlation with offline performance gains. These aspects were also found with VPL of TDT.  
40 The results of the present study demonstrate that offline performance gains are not specific to a  
41 discrimination task such as TDT, and can be generalized to other forms of VPL tasks, along with  
42 trained-feature specificity. Moreover, the present results also suggest that sigma activity in the  
43 trained region of early visual areas plays an important role in offline performance gains of VPL  
44 of detection as well as discrimination tasks.  
45

## 46 **Introduction**

47

48         After the initial acquisition of a skill, a learning state goes through an offline process,  
49 through which further improvement on performance is achieved without actual training (Karni et  
50 al., 1998; Walker, 2005), termed offline performance gains. It has been suggested that sleep  
51 plays an essential role in offline performance gains in various types of learning (Gais et al., 2000;  
52 Maquet et al., 2000; Stickgold et al., 2000a; Stickgold et al., 2000b; Laureys et al., 2001; Gais et  
53 al., 2002; Walker et al., 2002; Mednick et al., 2003; Huber et al., 2004; Stickgold, 2005; Walker,  
54 2005; Walker and Stickgold, 2005; Walker et al., 2005; Matarazzo et al., 2008; Tamaki et al.,  
55 2008; Yotsumoto et al., 2009b; Diekelmann and Born, 2010; Born and Wilhelm, 2012; Mascetti  
56 et al., 2013; Rasch and Born, 2013; Tamaki et al., 2013; Bang et al., 2014; McDevitt et al., 2014;  
57 Tononi and Cirelli, 2014). One type of learning for which sleep is beneficial is visual perceptual  
58 learning (VPL) (Karni et al., 1994; Gais et al., 2000; Stickgold et al., 2000a; Mednick et al.,  
59 2003; Censor et al., 2006; Yotsumoto et al., 2009b; Bang et al., 2014). VPL refers to a long-  
60 lasting performance improvement on a visual task after visual experience (Sasaki et al., 2010; Lu  
61 et al., 2011; Sagi, 2011), and has been proposed to primarily involve reorganization in early  
62 visual areas (Schoups et al., 2001; Schwartz et al., 2002; Shibata et al., 2017) (but see other  
63 studies (Law and Gold, 2008; Xiao et al., 2008)). After sleep, either night sleep or a daytime nap,  
64 the performance on VPL is significantly enhanced compared to that before sleep. In addition, the  
65 amount of improvement after sleep surpasses that after the same amount of time, which does not  
66 include sleep (Karni et al., 1994; Gais et al., 2000; Stickgold et al., 2000a; Mednick et al., 2003;  
67 Censor et al., 2006; Yotsumoto et al., 2009b; Bang et al., 2014).

68         However, it remains to be elucidated whether offline performance gains are generalized  
69 to VPL tasks. The majority of studies which found that sleep plays a role in the performance gain  
70 in VPL used the texture discrimination task (or ‘TDT’), which is a standard task in VPL (Karni  
71 et al., 1994; Gais et al., 2000; Stickgold et al., 2000a; Mednick et al., 2003; Censor et al., 2006;  
72 Yotsumoto et al., 2009b; Bang et al., 2014). Curiously, other studies that found offline  
73 performance gains of sleep in VPL also used a discrimination task, including coarse orientation  
74 discrimination (Matarazzo et al., 2008; Mascetti et al., 2013) and motion direction discrimination  
75 tasks (McDevitt et al., 2014). Importantly, it has been suggested that the underlying mechanisms  
76 between a detection task and a discrimination task are significantly different (Regan and

77 Beverley, 1985; Jazayeri and Movshon, 2006; Bridwell et al., 2013). This raises the question as  
78 to whether sleep is effective on VPL in general, including a detection task, or whether the effect  
79 of sleep on VPL is specific to discrimination tasks.

80 In addition, it is controversial which spontaneous brain activity during sleep is involved  
81 in offline performance gains of VPL. Sleep spindles (13-16 Hz) are characteristic spontaneous  
82 brain activity during non-rapid eye movement (NREM) sleep typically used for sleep stage  
83 scoring and appear around the central brain regions. Sleep spindles have been shown to be  
84 involved in motor memory in human (Manoach and Stickgold, 2009; Manoach et al., 2010;  
85 Tamaki et al., 2013; Manoach et al., 2016; Laventure et al., 2018) and have been suggested to  
86 enhance plasticity (Sejnowski and Destexhe, 2000; Rosanova and Ulrich, 2005). Sigma activity  
87 (13-16 Hz) is a spontaneous oscillatory activity during sleep whose frequency corresponds to  
88 sleep spindles. Since VPL is assumed to involve early visual areas, instead of typical sleep  
89 spindles appearing around the central brain regions, previously we measured the strength of  
90 regional sigma activity from early visual areas during sleep and found the correlation with the  
91 degree of offline performance gains of TDT (Bang et al., 2014). In the current study, we tested  
92 whether regional sigma activity in early visual areas is also involved in offline performance gains  
93 of the Gabor orientation detection task.

94 First, the results show that the performance on the Gabor orientation detection task  
95 improved significantly after the night of sleep without any additional training. No such offline  
96 performance gain was found after the same amount of interval that included only wakefulness.  
97 Second, we found that offline performance gains occur after a daytime nap as well. Moreover,  
98 sigma activity was significantly larger in the trained region than in the untrained region in early  
99 visual areas. The performance improvement over the nap significantly correlated with the power  
100 of sigma activity in the trained region of early visual areas. The present results suggest that  
101 offline performance gains occur not only a discrimination task but also in a detection task, and  
102 that sigma activity in the trained region of early visual areas during sleep may play a common  
103 role in offline performance gains of VPL.

104

## 105 **Material and Methods**

### 106 *Participants*

107 We conducted a careful screening process for eligibility for participation, since various  
108 factors are known to influence visual sensitivity and sleep structures. All the subjects had no  
109 prior experience in VPL tasks, as experiences in VPL tasks may cause a long-term visual  
110 sensitivity change (Karni and Sagi, 1991; Schwartz et al., 2002; Seitz et al., 2005; Yotsumoto et  
111 al., 2009a; Sasaki et al., 2010; Lu et al., 2011; Sagi, 2011). People who play action video games  
112 frequently were excluded because extensive video game playing affects visual and attention  
113 processing (Green and Bavelier, 2003; Li et al., 2009; Berard et al., 2015). In addition, subjects  
114 were required to have a regular sleep schedule and anyone who had a physical or psychiatric  
115 disease, was currently under medication, or was suspected to have a sleep disorder was excluded,  
116 as these factors are known to impact sleep structures (Horikawa et al., 2013; Tamaki et al., 2014;  
117 2016). None had medical conditions, including sleep disorders according to the self-reports. All  
118 subjects gave written informed consent for their participation in experiments. This study was  
119 approved at the institutional review board at Brown University.

120 A total of seventeen young healthy subjects with normal or corrected-to-normal vision  
121 participated in the study. A total of eight subjects participated in Experiment 1. They were  
122 randomly assigned to the sleep group (four subjects; 3 females,  $20.0 \pm 0.48$  years old, mean  $\pm$   
123 SEM) or to the wake group (four subjects; 3 females,  $23.0 \pm 1.22$  years old, mean  $\pm$  SEM). A  
124 total of nine subjects (4 females,  $24.3 \pm 0.55$  years old, mean  $\pm$  SEM) participated in Experiment  
125 2. In Experiment 2, which was a within-subject design, all subjects had a nap.

126

### 127 *Experimental design for Experiment 1*

128 The subjects in the sleep group arrived at the experimental room at 9 pm. We explained how to  
129 perform the task (the introductory session, see below). Then the subjects performed a pre-  
130 training test session of the orientation detection task (see *Orientation detection task* below) to  
131 measure their initial performance level before training (**Fig. 1A, Sleep group**). After the pre-  
132 training test session, which took approximately 5 min, the subjects underwent intensive training  
133 on the task for approximately 45 min. After the training session, a post-training test session  
134 (approximately 5 min) was conducted to measure the performance change by training. These 3  
135 sessions (pre-training test, training, post-training test) lasted about one hour in total to complete.  
136 There were approximately 2-min breaks between the pre-training test and the onset of training  
137 sessions, as well as between the training and the onset of post-training test sessions. After the

138 completion of the post-training test session, the subjects slept at their home. In the next morning  
139 (9am), the subjects performed a post-interval test session. The post-interval test session lasted  
140 approximately 5 min.

141 The subjects in the control wake group arrived at the experimental room at 9 am. After  
142 the introduction session, they performed a pre-training test session, training session and a post-  
143 training test session, with 2-min break in-between. These sessions took place in the morning  
144 between 9-10am (**Fig. 1A, Wake group**). At 9 pm on the same day, they performed a post-  
145 interval test session. No sleep was allowed during the day for the Wake group.

146 The degree of subjective sleepiness was measured by the Stanford Subjective Sleepiness  
147 (SSS) scale (Hoddes et al., 1973) before each of the test sessions for both groups.

148

### 149 ***Experimental design for Experiment 2***

150 Subjects in Experiment 2 underwent two sleep sessions at our sleep laboratory,  
151 adaptation and main experimental sleep sessions. The adaptation session was conducted prior to  
152 the main experimental sleep session for the following reason. It has been shown that when  
153 subjects sleep in a sleep laboratory for the first time, the sleep quality is degraded due to the new  
154 environment, termed the first-night effect (FNE) (Agnew et al., 1966; Carskadon and Dement,  
155 1981; Tamaki et al., 2005; Tamaki et al., 2016). To mitigate the FNE, an adaptation sleep session  
156 was necessary prior to the main experimental sleep session. During the adaptation sleep session,  
157 all electrodes were attached to the subjects for polysomnography (PSG) measurement. The  
158 subjects slept in the same fashion as in the experimental sleep session. The adaptation session  
159 was conducted approximately a week before the main experimental sleep session so that any  
160 effects due to sleeping during the adaptation sleep session would not carry over to the  
161 experimental sleep session.

162 On the day of the main experimental sleep session, the subjects arrived at the  
163 experimental room approximately at noon (**Figure 1B, Nap group**). Then, electrodes were  
164 attached for PSG measurement (see ***PSG measurement***) for which it took about an hour. After  
165 the electrodes were attached, behavioral task sessions were conducted in the same way as in  
166 Experiment 1. After the introductory session in which we explained how to perform the task, the  
167 subjects conducted a pre-training test session of the task to measure their initial performance  
168 level before training (~5 min). After the pre-training test session, the subjects underwent

169 intensive training on the task (~ 45 min). After the training session, the post-training test session  
170 (~5 min) was conducted to measure performance changes by training. There were approximately  
171 2-min short breaks between the pre-training test and training sessions, as well as between the  
172 training and post-training test sessions.

173 Shortly after the completion of the post-training test session, room lights were turned off  
174 and the sleep session began at approximately 2 pm, lasting 90 min. This lights-off time being  
175 about 2 pm was chosen to take advantage of the effect known as “mid-afternoon dip”, which  
176 should facilitate the onset of sleep even in subjects who do not customarily nap (Monk et al.,  
177 1996; Horikawa et al., 2013; Tamaki et al., 2016). During the sleep session, PSG was measured  
178 (see *PSG measurement*). Immediately after the sleep session, a questionnaire was administered  
179 to collect data about subjects’ introspection regarding the nap (Tamaki et al., 2016). There was a  
180 30 min break after the sleep session to reduce the sleep inertia, which is a prolonged sleepiness  
181 upon waking, known to impair performance (Lubin et al., 1976). After the 30-min break, a post-  
182 sleep test session (~ 5 min) was conducted to measure the changes in performance over the sleep  
183 session.

184 Subjective and behavioral sleepiness (SSS (Hoddes et al., 1973), and PVT (Dinges and  
185 Powell, 1985), respectively) were measured three times prior to each test session (see *Sleepiness*  
186 *measurement*).

187 To collect data about subjects’ sleep habit and handedness, 3 types of questionnaires were  
188 administered prior to an adaptation sleep session. They were the Pittsburg Sleep Quality Index  
189 questionnaire (PSQI; (Buysse et al., 1989)), the Morningness-Eveningness Questionnaire (MEQ;  
190 (Horne and Ostberg, 1976)), and the Edinburgh Handedness Questionnaire (Oldfield, 1971).  
191 Using the PSQI, we measured the following parameters: Habitual sleep quality (%), obtained by  
192  $[(\text{Number of hours slept} / \text{Number of hours spent in bed}) \times 100]$ , the average bedtime, wake-up  
193 time, and subjective sleep-onset latency, and the global PSQI score. The global PSQI score  
194 indicates the quality of subjects’ habitual sleep (range: 0-21, a global score of >5 suggests poor  
195 sleep). The MEQ estimates individual circadian variations. All the subjects in Experiment 2 were  
196 right-handed according to the answer in the handedness questionnaire.

197

198 ***Orientation detection task***

199 A Gabor patch was used for the orientation detection task (**Fig. 1C**). The diameter of the  
200 Gabor patch was 10 degrees, presented at the center of the screen. The spatial frequency of the  
201 Gabor patch was 1 cycle per degree, and the Gaussian filter sigma was 2.5 degrees. Gabor  
202 patches were spatially masked by a noise pattern that was generated from a sinusoidal luminance  
203 distribution at a given SNR (Shibata et al., 2017). The average luminance of the stimulus was  
204  $130.7 \pm 3.28 \text{ cd/m}^2$ .

205 Subjects performed the orientation detection task with a two-interval forced choice  
206 (2IFC) as in previous studies (Xiao et al., 2008; Shibata et al., 2017). Subjects were presented  
207 with two types of displays. One display contained a Gaussian windowed sinusoidal grating  
208 (Gabor) patch with a certain signal-to-noise ratio (SNR). The other display had only noise (0%  
209 SNR). Each trial started with a 500-ms fixation interval. Two displays were presented  
210 sequentially for 92 ms, with a 600-ms inter-stimulus-interval (Xiao et al., 2008; Zhang et al.,  
211 2010). After the two displays were presented, subjects were asked to report which display (the  
212 first or the second) contained stripes, by pressing the '1' or '2' button on a keyboard.

213 The threshold SNR was measured for each orientation. The initial SNR was set to 25%.  
214 The step size of the staircase was 0.03 log units to adjust the SNR with a 2-down 1-up staircase  
215 procedure, which yields about 70% accuracy. The temporal order of the two displays (a Gabor  
216 patch + noise or noise alone) was randomly determined in each trial. Subjects were instructed to  
217 fixate on a white bull's eye fixation point (diameter = 1.5 degrees) throughout the display  
218 presentations for each trial. No feedback on the accuracy of a response was provided.

219 The orientation of the Gabor patch was  $10^\circ$ ,  $70^\circ$ , or  $130^\circ$ . One orientation was randomly  
220 selected as the trained orientation for each subject. Another orientation was randomly selected as  
221 an untrained orientation. The remaining one orientation was used for the introductory session  
222 (see below). In the training session, a total of 600 trials was performed in 6 blocks (each 100  
223 trials) with the trained orientation. The test sessions measured the threshold SNR for the trained  
224 and untrained orientations, for each of which one block of staircase was performed. Each block  
225 for each orientation ended after 10 reversals, which resulted in about 40 trials per orientation.  
226 The geometric mean of the last 6 reversals in each block was obtained as the threshold SNR for  
227 the orientation.

228 The performance improvement (%) by training was calculated as the percent change in  
229 the threshold SNR measured at the post-training test session normalized by that at the pre-



230 training test session [performance improvement at post-training: (pre-training – post-  
231 training)/pre-training x 100]. The performance improvement (%) by the interval (sleep or wake)  
232 was calculated at the post-interval test session relative to the post-training test session  
233 [performance improvement at post-interval: (post-training – post-interval)/post-training x 100].

234 During the introductory session, we explained how to perform the 2IFC Gabor  
235 orientation detection task, before the pre-training test in both Experiments 1 and 2. There were  
236 approximately 20-30 trials in this session until the subjects reached a certain level of  
237 performance. The orientation of the Gabor used for this session was neither trained nor untrained  
238 orientation, as mentioned above. In addition, just before the post-interval test session in  
239 Experiment 1 and just before the post-sleep session in Experiment 2, the second introductory  
240 session was performed with approximately 10 trials to remind the subjects of what the task was.

241

#### 242 ***PSG measurement***

243 In Experiment 2, the attachment of electrodes for polysomnogram (PSG) measurement,  
244 which took approximately 45 min, was conducted prior to the first introductory session. PSG  
245 consisted of EEG, electrooculogram (EOG), electromyogram (EMG), and electrocardiogram  
246 (ECG). EEG was recorded at 25 scalp sites according to the 10% electrode position (Sharbrough  
247 et al., 1991) using active electrodes (actiCap, Brain Products, LLC) with a standard amplifier  
248 (BrainAmp Standard, Brain Products, LLC). The online reference was Fz, and it was re-  
249 referenced to the average of the left (TP9) and right (TP10) mastoids after the recording.  
250 Sampling frequency was 500 Hz. The impedance of active electrodes was kept below 20 k $\Omega$ . The  
251 active electrodes included a new type of integrated impedance converter, which allowed them to  
252 transmit the EEG signal with significantly lower levels of noise than traditional passive electrode  
253 systems. The data quality with active electrodes with the impedance below 20 k $\Omega$  was as good as  
254 5 k $\Omega$  using passive electrodes (Tamaki et al., 2016). The passive electrodes were used for EOG,  
255 EMG, and ECG (BrainAmp ExG, Brain Products, LLC). Horizontal EOG was recorded using  
256 two electrodes placed at the outer canthi of both eyes. Vertical EOG was measured using 4  
257 electrodes 3 cm above and below both eyes. EMG was recorded from the mentum (chin). The  
258 impedance was kept around 10 k $\Omega$  for the passive electrodes. Brain Vision Recorder software  
259 (Brain Products, LLC) was used for recording. The data was filtered between 0.1 and 100 Hz.  
260 PSG was recorded in a soundproof and shielded room.

261

### 262 *Sleep-stage scoring and sleep parameters*

263         Based on the PSG data acquired during Experiment 2, sleep stages were scored for every  
264 30-s epoch, following the standard criteria (Rechtschaffen and Kales, 1968; Iber et al., 2007) into  
265 stage wakefulness (stage W), non-rapid eye movement (NREM) stage 1 sleep (stage N1), NREM  
266 stage 2 sleep (stage N2), NREM stage 3 sleep (stage N3), and stage REM sleep (REM sleep).  
267 Standard sleep parameters were obtained to indicate a general sleep structure for each  
268 experiment to confirm that there is no abnormality in subjects' sleep structures. Sleep parameters  
269 included the sleep-onset latency (SOL, the latency to the first appearance of stage N2 from the  
270 lights-off), the percentage of each sleep stage, wake time after sleep onset (WASO, the total time  
271 of stage W after sleep onset), sleep efficiency (SE, the total percentage spent in sleep), and the  
272 time in bed (TIB, the time interval between lights-off and lights-on) (Iber et al., 2007).

273

### 274 *EEG analyses*

275         A fast-Fourier transformation was applied to the EEG data in 5-sec epochs and smoothed  
276 with a tapered cosine window (Nobili et al., 1999) to compute brain activities. Six epochs were  
277 used to yield the averaged spectral data of 30 s. Spectral powers for sigma activity (13-16 Hz  
278 frequency bands) were obtained during NREM sleep stages (from both N2 and N3). Sigma  
279 activity of the trained region were obtained by averaging sigma power measured across six  
280 occipital electrodes (PO3, PO7, O1, PO4, PO8, O2) that would cover early visual areas, which  
281 are assumed to be involved in the Gabor orientation task according to the previous studies (Thut  
282 et al., 2006; Viemose et al., 2013). We also obtained sigma activity from the control regions (P7,  
283 P8) that are close to the middle temporal gyrus (or MT area) (Seeck et al., 2017). The MT area  
284 was chosen as a control, because this region is unlikely to be involved in offline performance  
285 gains of a Gabor orientation detection task, given that the MT area is known to be involved in  
286 coherent motion perception (Newsome and Pare, 1988; Rees et al., 2000). We computed trained-  
287 region specific sigma activity by subtraction of sigma activity of the control region from that of  
288 the trained region.

289

### 290 *Statistical analyses*

291         The  $\alpha$  level (Type I error rate) of 0.05 was set for all statistical analyses. The Shapiro-

292 Wilk test was conducted for all the data, by which we confirmed that all the data were normally  
293 distributed (all  $p > 0.05$ ). The Levene's test was conducted to test for homogeneity of variance. It  
294 was confirmed that homogeneity of variance was not violated for all the data (all  $p > 0.05$ ). The  
295 Grubbs' test was conducted to detect outliers. No outlier data was included in the results.

296 To analyze performance improvement, ANOVA was first conducted, then  $t$ -tests were  
297 conducted as post-hoc tests. When a correction for multiple comparisons was necessary for  
298 multiple  $t$ -tests, we controlled the false discovery rate (FDR) (Benjamini and Hochberg, 1995) to  
299 be at 0.05. To obtain correlation coefficients, Pearson's correlation was used.

300 Statistical tests were conducted by SPSS (ver. 22, IBM Corp.).

301

## 302 **Results**

### 303 **Experiment 1**

304 We hypothesized that the offline performance gains occur in the Gabor orientation  
305 detection task. If this was the case, then the performance improvement over the interval should  
306 be larger in the sleep group than the wake group. In addition, since the Gabor orientation  
307 detection task has trained-feature specificity (Shibata et al., 2017), we hypothesized that offline  
308 performance gains occur with the trained orientation, not with the untrained orientation.

309 To test whether performance improvement over the interval is larger in the sleep  
310 condition, and whether the improvement was specific to the trained orientation, we conducted a  
311 2-way mixed-design ANOVA with Group (sleep vs. wake) and Orientation (trained vs.  
312 untrained) factors on the performance improvement at the post-interval test session. The results  
313 are shown in **Fig. 2**. The ANOVA indicated a significant 2-way interaction ( $F(1,6)=6.51$ ,  
314  $p=0.043$ ), a significant main effect of Group ( $F(1,6)=12.63$ ,  $p=0.012$ ) and a significant main  
315 effect of Orientation ( $F(1,6)=16.45$ ,  $p=0.007$ ). For the trained orientation, the post-hoc tests  
316 revealed that there was a significant difference in the performance improvement between the  
317 sleep and wake groups but not for the untrained orientation (trained,  $t(6)=4.11$ ,  $p=0.006$ ,  $q<0.05$ ,  
318 FDR for 2 comparisons; untrained,  $t(6)=0.04$ ,  $p=0.967$ ). Furthermore, one-sample  $t$ -tests showed  
319 that the performance improvement for the trained orientation at post-interval was significantly  
320 different from 0 for the sleep group but not for the wake group (the sleep group,  $t(3)=7.49$ ,  
321  $p=0.005$ ,  $q<0.05$ , FDR for 4 comparisons including the following 3 one sample  $t$ -tests; the wake  
322 group,  $t(3)=0.14$ ,  $p=0.897$ ). In contrast, the performance improvement for the untrained

323 orientation at post-interval was not significantly different from 0 for both groups (one-sample t-  
324 test, sleep group:  $t(3)=1.74$ ,  $p=0.181$ ; wake group:  $t(3)=2.29$ ,  $p=0.106$ ). Thus, offline  
325 performance gains were found for the Gabor orientation detection task, only with the trained  
326 orientation. These results were consistent with the hypotheses.

327 We performed following control analyses to rule out the possibility the difference in the  
328 offline performance between the groups was caused by some factors other than the experimental  
329 manipulation.

330 First, we tested whether the initial SNR threshold level was different before training  
331 between the groups. However, we did not find a significant difference between the sleep and  
332 wake groups in the SNR threshold in the pre-training test session ( $t(6)=0.07$ ,  $p=0.945$ ).

333 Next, we tested whether the training effect was different between the sleep and wake  
334 groups. A 2-way mixed model ANOVA with Group (sleep vs wake) and Orientation (trained vs  
335 untrained) factors was conducted on the performance improvement at the post-training test  
336 session. However, there was no significant main effect of Group ( $F(1,6)=0.06$ ,  $p=0.811$ ), no  
337 significant main effect of Orientation ( $F(1,6)=0.02$ ,  $p=0.899$ ), or no significant interaction  
338 between the factors ( $F(1,6)=0.48$ ,  $p=0.514$ ) was found. The results indicate that the effect of  
339 training was not significantly different between the groups.

340 Finally, we tested whether the degree of subjective sleepiness was different between the  
341 sleep and the wake groups, as the sleepiness may impact on the performance of the detection task.  
342 A 2-way mixed design ANOVA with Group (sleep vs wake) and Session (pre-training, post-  
343 training, post-interval) was conducted on the SSS ratings. None of the main effect of Group  
344 ( $F(1,6)=0.17$ ,  $p=0.695$ ), Session ( $F(2,12)=3.17$ ,  $p=0.079$ ), or interaction between the factors  
345 ( $F(2,12)=1.50$ ,  $p=0.262$ ) was significant.

346 These results indicate that the significant difference between the two groups in the  
347 performance improvement over the interval at the post-interval test session cannot be attributed  
348 to the initial performance, the effect of training, or subjective sleepiness.

349

## 350 **Experiment 2**

351 In Experiment 2, we tested whether offline performance gains occur with a nap in the  
352 Gabor orientation detection task and investigated whether sigma activity during NREM sleep  
353 was involved in offline performance gains of the task.

354

### 355 ***VPL performance***

356 We first examined whether the performance on the orientation detection task was  
357 improved only in the trained orientation after daytime nap. We conducted one-sample t-tests for  
358 the performance changes for each of the trained and untrained orientations at the post-sleep test  
359 session. The results indicated that offline performance gains occurred with the nap in the trained  
360 orientation (**Fig. 3**). The performance was significantly improved for the trained orientation but  
361 not for the untrained orientation (trained,  $t(8) = 3.55$ ,  $p = 0.008$ ,  $q < 0.05$ , FDR for 2 comparisons;  
362 untrained,  $t(8) = 0.25$ ,  $p = 0.811$ ). Furthermore, a paired t-test showed that the performance  
363 improvement at post-sleep was significantly different between the trained and untrained  
364 orientations ( $t(8) = 2.79$ ,  $p = 0.024$ ). Thus, offline performance gains by nap were specific to the  
365 trained orientation.

366 Importantly, the difference in the performance improvement between the trained and  
367 untrained orientations was not apparent until after sleep. First, there was no significant difference  
368 in the initial SNR threshold between the trained vs. untrained orientations at the pre-training test  
369 session before training ( $t(8) = 1.29$ ,  $p = 0.234$ ). Second, there was no significant difference in the  
370 performance improvement (%) by training at the post-training test session ( $t(8) = 0.65$ ,  $p =$   
371  $0.531$ ). These indicate that the performance improvement specific to the trained orientation  
372 emerged only after sleep.

373 We compared the amount of offline performance gains obtained in Experiments 1 and 2.  
374 There was not a significant difference in the amount of offline performance gains between the  
375 experiments ( $t(15) = 0.14$ ,  $p = 0.887$ ), while the amount of the performance gains in Experiment 2  
376 was smaller than that of Experiment 1. Thus, offline performance gains were not significantly  
377 different between by night sleep and by a nap.

378

### 379 ***Sigma activity during NREM sleep and the offline performance gain***

380 We tested the hypothesis that sigma activity was involved in the offline performance gain  
381 of the detection task in a trained region specific manner. First, we obtained sigma activity in the  
382 trained and untrained regions (see **EEG analyses** in **Materials and Methods** for more details  
383 about regions). We tested whether sigma activity was larger in the trained than untrained regions.  
384 We found a significant difference in sigma activity between the regions (paired t-test,  $t(8) = 4.86$ ,

385  $p=0.001$ ). Sigma activity was significantly larger in the trained than untrained regions. Next, we  
386 tested whether trained-region specific sigma activity was correlated with the performance change  
387 over sleep (from the post-training test session to the post-sleep test session, **Fig. 4**, see *EEG*  
388 *analyses* in **Materials and Methods**; see **Table 1** for sleep parameters for the sleep session). We  
389 found a significant correlation between them (**Fig. 4**,  $r=0.74$ ,  $p=0.024$ ,  $n=9$ ). The Grubbs' test  
390 indicated that there was no outlier in the data. Thus, the result was consistent with the hypothesis  
391 that sigma activity was involved in the offline performance gain of the detection task in a trained  
392 region specific manner.

393 We next tested whether any macroscopic sleep variables, such as the duration of each  
394 sleep stage was associated with the offline performance gain (see **Table 1** for all the sleep  
395 parameters). We measured the Pearson's correlation coefficient with the performance change  
396 over sleep and the durations of each of the sleep stages (W, N1, N2, N3, REM sleep). As a result,  
397 none of the durations of sleep stages was significantly correlated with the offline performance  
398 gain (stage W,  $r=-0.18$ ,  $p=0.642$ ; stage N1,  $r=0.31$ ,  $p=0.418$ , stage N2,  $r=0.10$ ,  $p=0.791$ ; stage N3,  
399  $r=-0.25$ ,  $p=0.517$ ; REM sleep,  $r=0.49$ ,  $p=0.181$ , without multiple corrections).

400 We calculated other sleep parameters such as sleep-onset latency (SOL, from the lights-  
401 off to sleep onset time (min)), sleep efficiency (SE, the total sleep time divided by the time in  
402 bed x 100 (%)), wake time after sleep onset (WASO, min), and total time in bed (TIB (min))  
403 shown in **Table 1**. We tested whether these parameters explain the offline performance gains by  
404 calculating correlation coefficients. However, none of them was significantly correlated with the  
405 offline performance gains (SOL,  $r=0.23$ ,  $p=0.551$ ; SE  $r=0.18$ ,  $p=0.645$ ; WASO,  $r=-0.35$ ,  
406  $p=0.350$ ; TIB,  $r=0.17$ ,  $p=0.669$ ).

407

#### 408 ***Quality of habitual sleep and circadian variations***

409 The sleep quality in Experiment 2 was relatively poorer than our recent studies (Bang et  
410 al., 2014; Tamaki et al., 2016). The sleep efficiency (%) during the sleep session in the sleep  
411 group was 73.6% (**Table 1**). In contrast, in our previous study, the sleep efficiency was about  
412 88.7%-92.8% (Bang et al., 2014; Tamaki et al., 2016) in a sleep session which was done after the  
413 adaptation session to eliminate the FNE (Tamaki et al., 2016) (see *Experimental design for*  
414 *Experiment 2* in **Materials and Methods** for more information on the FNE). In a similar vein,  
415 the WASO in the present study (14.2 min) seems longer compared to the previous studies where

416 it was only 1 - 4.18 min (Bang et al., 2014; Tamaki et al., 2016).

417 This made us wonder whether the subjects in Experiment 2 were actually poor sleepers,  
418 and/or whether they were extreme morning- or evening types. Thus, we analyzed whether the  
419 quality of subjects' habitual sleep was poor using the PSQI questionnaire (Buysse et al., 1989),  
420 and whether they were extreme morning or evening type using the MEQ questionnaire (Horne  
421 and Ostberg, 1976). The PSQI and MEQ were administered prior to sleep sessions in Experiment  
422 2 (**Table 2**).

423 PSQI assesses whether subjects have a sleep problem (Buysse et al., 1989). If the global  
424 PSQI score equals or is larger than 5, this suggests that subjects have a sleep problem. However,  
425 the average global PSQI score in the subjects in Experiment 2 was  $2.7 \pm 0.37$ , ranged 1-4, which  
426 indicated that none of subjects was suspected of having sleep problems. In addition, based on the  
427 PSQI data, we obtained the subjects' habitual bedtime, wake-up time, the average sleep-onset  
428 latency, the estimated sleep duration, and the habitual sleep efficiency (**Table 2**). These scores in  
429 the present subjects in Experiment 2 were considered in normal ranges (Buysse et al., 1989).

430 MEQ assesses whether the subject is a morning type or evening type (Horne and Ostberg,  
431 1976). Such variations in the circadian timing may affect performance (Kerkhof, 1985). The  
432 average MEQ score was  $55.2 \pm 2.63$  with the range between 46-67, which fell into the  
433 intermediate type of morningness-eveningness (neither extreme morning nor evening type)  
434 (Horne and Ostberg, 1976). These results confirmed that none of the subjects had sleep problems  
435 or was of extreme morning or evening type, suggesting that all the subjects had normal sleep-  
436 wake habits and were all good sleepers.

437 We next examined whether any of the measures of sleep habits or habitual sleep quality  
438 were related to the performance change. We measured the Pearson's correlation coefficient  
439 between the offline performance gain over sleep and the habitual sleep efficiency, the habitual  
440 sleep duration, the global PSQI score, and MEQ score. None of these showed a significant  
441 correlation with the offline performance gain (the habitual sleep duration,  $r=0.54$ ,  $p=0.134$ ; the  
442 habitual sleep efficiency,  $r=0.52$ ,  $p=0.150$ ; the global PSQI score,  $r=0.12$ ,  $p=0.763$ ; the MEQ  
443 score,  $r=-0.66$ ,  $p=0.052$ , without correction for multiple comparisons).

444

445 **Discussion**

446           The present results demonstrated that the offline performance gain occurred with a Gabor  
447 orientation detection task by nocturnal sleep as well as a daytime nap, in a trained-feature  
448 specific manner. Most of the previous studies, which tested offline performance gains in VPL  
449 used a discrimination task, in particular, TDT. However, the present study clearly showed that  
450 offline performance gains occur with a Gabor orientation detection task. This indicates that  
451 offline performance gains are not specific to a discrimination task in VPL.

452           We found that regional sigma activity in early visual areas was significantly correlated  
453 with performance change on the orientation detection task between before and after sleep. It was  
454 shown that sigma activity was involved in the offline performance gain of a different task (TDT)  
455 over sleep (Bang et al., 2014). Thus, it is possible that offline performance gain is commonly  
456 associated with regional sigma activity during sleep in visual areas for VPL.

457           Sigma activity corresponds to the activities of sleep spindles, which are associated with  
458 various types of learning, including learning on declarative and procedural motor tasks (Gais et  
459 al., 2002; Schabus et al., 2004; Clemens et al., 2006; Fogel and Smith, 2006; Nishida and Walker,  
460 2007; Tamminen et al., 2010; Tamaki et al., 2013; Laventure et al., 2016; Antony et al., 2018;  
461 Boutin et al., 2018). Sleep spindles are specific waves used for sleep stage scoring and appear  
462 around the central region during NREM sleep (Rechtschaffen and Kales, 1968; Iber et al., 2007).  
463 In the present study, because early visual areas were the targeted regions for offline performance  
464 gains of VPL over sleep, we extracted the strength of sigma activity that corresponds to the  
465 frequency of sleep spindles from early visual areas. The precise causal relationship between  
466 sigma activity and learning are yet to be clarified. However, it has been shown that stimulation  
467 whose frequency corresponded to sleep spindles increases long-term potentiation (Rosanova and  
468 Ulrich, 2005). Thus, the present results support the idea that regional sigma activity in early  
469 visual areas plays a crucial role in offline performance gains of VPL, possibly by increasing  
470 regional plasticity in early visual areas during NREM sleep.

471           The general sleep quality, as indicated in the sleep efficiency and wake time after sleep  
472 onset in Experiment 2 seemed to be lower in the present study in comparison to our previous  
473 studies (Bang et al., 2014; Tamaki et al., 2016). Although this is beyond the scope of the present  
474 study, we speculate that it might be caused by the light exposure from the display of the current  
475 stimulus. It has been shown that light exposures before sleep lower the sleep quality and cause  
476 more arousals during sleep (Czeisler et al., 1986; Czeisler et al., 1990; Khalsa et al., 2003). As



477 such, it has been shown that playing a computer game with a bright display worsens the sleep  
478 quality (Higuchi et al., 2005). In one of our previous studies, which used TDT, the sleep  
479 efficiency was about 90% (Bang et al., 2014) while the sleep efficiency was 74.6% in the present  
480 study. We measured the luminance for these stimuli. Interestingly, the average luminance for one  
481 trial of the Gabor orientation detection task used in the present study was  $130.7 \pm 3.28$  cd/m<sup>2</sup>,  
482 whereas that of TDT was only  $0.4 \pm 0.07$  cd/m<sup>2</sup>. Thus, the current visual stimulus was much  
483 brighter than the previous one, as the average luminance of the used visual stimuli was much  
484 higher in the present than previous studies (Bang et al., 2014). We speculate that this may be the  
485 trigger for the relatively lower quality of sleep in the present study, as other factors, which are  
486 known to influence the quality of sleep was controlled and matched between studies including  
487 the FNE (Agnew et al., 1966; Carskadon and Dement, 1981; Tamaki et al., 2005; Tamaki et al.,  
488 2016), age (Dijk et al., 2000) and habitual sleep problems (Buysse et al., 1989; Breslau et al.,  
489 1996; Morin et al., 1999; Morin et al., 2006). In addition, according to the PSQI and MEQ  
490 questionnaires, they were of good sleepers and intermediate morningness-eveningness types  
491 (Horne and Ostberg, 1976). Thus, only the brightness of the visual stimulus may account for the  
492 relatively lower quality of sleep in the present study.

493         However, it is important to note that the lower quality of sleep was not correlated with  
494 performance improvement over sleep in Experiment 2. None of sleep efficiency, wake time after  
495 sleep onset, sleep-onset latency and time in bed was correlated with performance improvement.  
496 If the wake time during the sleep session was the cause of offline performance gains, there  
497 should have been a good correlation for each parameter with offline performance gains. In  
498 addition, the results of Experiment 1 clearly showed that the interval that contained sleep led to  
499 performance improvements, while the interval that included only wakefulness did not lead to  
500 performance improvements. These results altogether demonstrate that offline performance gains  
501 of an orientation detection task are a sleep-state dependent process.

502         In conclusion, the present study demonstrates that offline performance gains were found  
503 after training on an orientation detection task. This indicates that offline performance gains are  
504 not limited to discrimination tasks including TDT. The present results also suggest that regional  
505 sigma activity plays a certain role in facilitation of VPL during sleep.

506  
507

508 **Acknowledgements**

509 This work was supported by NIH (R01EY019466, R01EY027841), NSF (BCS 1261765,  
510 1539717), US-Israel Bidirectional foundation (#2016058), and an Institutional Development  
511 Award (IDeA) from the National Institute of General Medical Sciences of the National Institutes  
512 of Health (P20GM103645). Part of this research was also supported by Center for Vision  
513 Research Brown University, and FY17 OVPR Seed Grant, Brown University.

514

515 **Author Contributions**

516 M.T. and Y.S. designed the research. M.T. and Z.W. performed the experiments and analyzed  
517 the data. M.T., T.W., and Y.S. wrote the manuscript.

518

519 **Conflict of Interest**

520 The authors declare no conflict of interest.

521

## 522 References

- 523 Agnew, H.W., Jr., Webb, W.B., and Williams, R.L. (1966). The first night effect: an EEG study  
524 of sleep. *Psychophysiology* 2(3), 263-266. doi: 10.1111/j.1469-8986.1966.tb02650.x
- 525 Antony, J.W., Piloto, L., Wang, M., Pacheco, P., Norman, K.A., and Paller, K.A. (2018). Sleep  
526 Spindle Refractoriness Segregates Periods of Memory Reactivation. *Curr Biol* 28(11),  
527 1736-1743 e1734. doi: 10.1016/j.cub.2018.04.020.
- 528 Bang, J.W., Khalilzadeh, O., Hamalainen, M., Watanabe, T., and Sasaki, Y. (2014). Location  
529 specific sleep spindle activity in the early visual areas and perceptual learning. *Vision Res*  
530 99, 162-171. doi: 10.1016/j.visres.2013.12.014.
- 531 Benjamini, Y., and Hochberg, Y. (1995). Controlling the false discovery rate: A practical and  
532 powerful approach to multiple testing. *J. R. Stat. Soc. Ser. B Stat. Methodol.* 57(1), 289-  
533 300.
- 534 Berard, A.V., Cain, M.S., Watanabe, T., and Sasaki, Y. (2015). Frequent video game players  
535 resist perceptual interference. *PLoS One* 10(3), e0120011. doi:  
536 10.1371/journal.pone.0120011.
- 537 Born, J., and Wilhelm, I. (2012). System consolidation of memory during sleep. *Psychol Res*  
538 76(2), 192-203. doi: 10.1007/s00426-011-0335-6.
- 539 Boutin, A., Pinsard, B., Bore, A., Carrier, J., Fogel, S.M., and Doyon, J. (2018). Transient  
540 synchronization of hippocampo-striato-thalamo-cortical networks during sleep spindle  
541 oscillations induces motor memory consolidation. *Neuroimage* 169, 419-430. doi:  
542 10.1016/j.neuroimage.2017.12.066.
- 543 Breslau, N., Roth, T., Rosenthal, L., and Andreski, P. (1996). Sleep disturbance and psychiatric  
544 disorders: a longitudinal epidemiological study of young adults. *Biol Psychiatry* 39(6),  
545 411-418.
- 546 Bridwell, D.A., Hecker, E.A., Serences, J.T., and Srinivasan, R. (2013). Individual differences in  
547 attention strategies during detection, fine discrimination, and coarse discrimination. *J*  
548 *Neurophysiol* 110(3), 784-794. doi: 10.1152/jn.00520.2012.
- 549 Buysse, D.J., Reynolds, C.F., 3rd, Monk, T.H., Berman, S.R., and Kupfer, D.J. (1989). The  
550 Pittsburgh Sleep Quality Index: a new instrument for psychiatric practice and research.  
551 *Psychiatry Res* 28(2), 193-213.
- 552 Carskadon, M.A., and Dement, W.C. (1981). Cumulative effects of sleep restriction on daytime  
553 sleepiness. *Psychophysiology* 18(2), 107-113. doi: 10.1111/j.1469-8986.1981.tb02921.x
- 554 Censor, N., Karni, A., and Sagi, D. (2006). A link between perceptual learning, adaptation and  
555 sleep. *Vision Res* 46(23), 4071-4074. doi: 10.1016/j.visres.2006.07.022.
- 556 Clemens, Z., Fabo, D., and Halasz, P. (2006). Twenty-four hours retention of visuospatial  
557 memory correlates with the number of parietal sleep spindles. *Neurosci Lett* 403(1-2), 52-  
558 56. doi: 10.1016/j.neulet.2006.04.035.
- 559 Czeisler, C.A., Allan, J.S., Strogatz, S.H., Ronda, J.M., Sanchez, R., Rios, C.D., et al. (1986).  
560 Bright light resets the human circadian pacemaker independent of the timing of the sleep-  
561 wake cycle. *Science* 233(4764), 667-671.
- 562 Czeisler, C.A., Johnson, M.P., Duffy, J.F., Brown, E.N., Ronda, J.M., and Kronauer, R.E. (1990).  
563 Exposure to bright light and darkness to treat physiologic maladaptation to night work. *N*  
564 *Engl J Med* 322(18), 1253-1259. doi: 10.1056/NEJM199005033221801.
- 565 Diekelmann, S., and Born, J. (2010). The memory function of sleep. *Nat Rev Neurosci* 11(2),  
566 114-126. doi: 10.1038/nrn2762.

- 567 Dijk, D.J., Duffy, J.F., and Czeisler, C.A. (2000). Contribution of circadian physiology and sleep  
568 homeostasis to age-related changes in human sleep. *Chronobiol Int* 17(3), 285-311.
- 569 Dinges, D.F., and Powell, J.W. (1985). Microcomputer analyses of performance on a portable,  
570 simple visual RT task during sustained operations. *Behavior Research Methods,*  
571 *Instruments, & Computers* 17(6), 652-655. doi: 10.3758/bf03200977.
- 572 Fogel, S.M., and Smith, C.T. (2006). Learning-dependent changes in sleep spindles and Stage 2  
573 sleep. *J Sleep Res* 15(3), 250-255. doi: 10.1111/j.1365-2869.2006.00522.x.
- 574 Gais, S., Molle, M., Helms, K., and Born, J. (2002). Learning-dependent increases in sleep  
575 spindle density. *J Neurosci* 22(15), 6830-6834. doi: 20026697.
- 576 Gais, S., Plihal, W., Wagner, U., and Born, J. (2000). Early sleep triggers memory for early  
577 visual discrimination skills. *Nat Neurosci* 3(12), 1335-1339. doi: 10.1038/81881.
- 578 Green, C.S., and Bavelier, D. (2003). Action video game modifies visual selective attention.  
579 *Nature* 423(6939), 534-537. doi: 10.1038/nature01647.
- 580 Higuchi, S., Motohashi, Y., Liu, Y., and Maeda, A. (2005). Effects of playing a computer game  
581 using a bright display on presleep physiological variables, sleep latency, slow wave sleep  
582 and REM sleep. *J Sleep Res* 14(3), 267-273. doi: 10.1111/j.1365-2869.2005.00463.x.
- 583 Hoddes, E., Zarcone, V., Smythe, H., Phillips, R., and Dement, W.C. (1973). Quantification of  
584 sleepiness: a new approach. *Psychophysiology* 10(4), 431-436. doi: 10.1111/j.1469-  
585 8986.1973.tb00801.x.
- 586 Horikawa, T., Tamaki, M., Miyawaki, Y., and Kamitani, Y. (2013). Neural decoding of visual  
587 imagery during sleep. *Science* 340(6132), 639-642. doi: 10.1126/science.1234330.
- 588 Horne, J.A., and Ostberg, O. (1976). A self-assessment questionnaire to determine morningness-  
589 eveningness in human circadian rhythms. *Int J Chronobiol* 4(2), 97-110.
- 590 Huber, R., Ghilardi, M.F., Massimini, M., and Tononi, G. (2004). Local sleep and learning.  
591 *Nature* 430(6995), 78-81.
- 592 Iber, C., Ancoli-Israel, S., Chesson, A., and Quan, S.F. (2007). *The AASM manual for the*  
593 *scoring of sleep and associated events: rules, terminology, and technical specification.*  
594 Westchester, IL: American Academy of Sleep Medicine.
- 595 Jazayeri, M., and Movshon, J.A. (2006). Optimal representation of sensory information by neural  
596 populations. *Nat Neurosci* 9(5), 690-696. doi: 10.1038/nn1691.
- 597 Karni, A., Meyer, G., Rey-Hipolito, C., Jezzard, P., Adams, M.M., Turner, R., et al. (1998). The  
598 acquisition of skilled motor performance: fast and slow experience-driven changes in  
599 primary motor cortex. *Proc Natl Acad Sci U S A* 95(3), 861-868.
- 600 Karni, A., and Sagi, D. (1991). Where practice makes perfect in texture discrimination: evidence  
601 for primary visual cortex plasticity. *Proc Natl Acad Sci U S A* 88(11), 4966-4970. doi:  
602 10.1073/pnas.88.11.4966.
- 603 Karni, A., Tanne, D., Rubenstein, B.S., Askenasy, J.J., and Sagi, D. (1994). Dependence on  
604 REM sleep of overnight improvement of a perceptual skill. *Science* 265(5172), 679-682.  
605 doi: 10.1126/science.8036518.
- 606 Kerkhof, G.A. (1985). Inter-individual differences in the human circadian system: a review. *Biol*  
607 *Psychol* 20(2), 83-112.
- 608 Khalsa, S.B., Jewett, M.E., Cajochen, C., and Czeisler, C.A. (2003). A phase response curve to  
609 single bright light pulses in human subjects. *J Physiol* 549(Pt 3), 945-952. doi:  
610 10.1113/jphysiol.2003.040477.

- 611 Laureys, S., Peigneux, P., Phillips, C., Fuchs, S., Degueldre, C., Aerts, J., et al. (2001).  
612 Experience-dependent changes in cerebral functional connectivity during human rapid  
613 eye movement sleep. *Neuroscience* 105(3), 521-525.
- 614 Laventure, S., Fogel, S., Lungu, O., Albouy, G., Seigny-Dupont, P., Vien, C., et al. (2016).  
615 NREM2 and Sleep Spindles Are Instrumental to the Consolidation of Motor Sequence  
616 Memories. *PLoS Biol* 14(3), e1002429. doi: 10.1371/journal.pbio.1002429.
- 617 Laventure, S., Pinsard, B., Lungu, O., Carrier, J., Fogel, S., Benali, H., et al. (2018). Beyond  
618 spindles: interactions between sleep spindles and boundary frequencies during cued  
619 reactivation of motor memory representations. *Sleep* zsy142. doi:  
620 <https://doi.org/10.1093/sleep/zsy142>.
- 621 Law, C.T., and Gold, J.I. (2008). Neural correlates of perceptual learning in a sensory-motor, but  
622 not a sensory, cortical area. *Nat Neurosci* 11(4), 505-513. doi: 10.1038/nn2070.
- 623 Li, R., Polat, U., Makous, W., and Bavelier, D. (2009). Enhancing the contrast sensitivity  
624 function through action video game training. *Nat Neurosci* 12(5), 549-551. doi:  
625 10.1038/nn.2296.
- 626 Lu, Z.L., Hua, T., Huang, C.B., Zhou, Y., and Doshier, B.A. (2011). Visual perceptual learning.  
627 *Neurobiol Learn Mem* 95(2), 145-151. doi: 10.1016/j.nlm.2010.09.010.
- 628 Lubin, A., Hord, D.J., Tracy, M.L., and Johnson, L.C. (1976). Effects of exercise, bedrest and  
629 napping on performance decrement during 40 hours. *Psychophysiology* 13(4), 334-339.  
630 doi: 10.1111/j.1469-8986.1976.tb03086.x.
- 631 Manoach, D.S., Pan, J.Q., Purcell, S.M., and Stickgold, R. (2016). Reduced Sleep Spindles in  
632 Schizophrenia: A Treatable Endophenotype That Links Risk Genes to Impaired  
633 Cognition? *Biol Psychiatry* 80(8), 599-608. doi: 10.1016/j.biopsych.2015.10.003.
- 634 Manoach, D.S., and Stickgold, R. (2009). Does abnormal sleep impair memory consolidation in  
635 schizophrenia? *Front Hum Neurosci* 3, 21. doi: 10.3389/neuro.09.021.2009.
- 636 Manoach, D.S., Thakkar, K.N., Stroynowski, E., Ely, A., McKinley, S.K., Wamsley, E., et al.  
637 (2010). Reduced overnight consolidation of procedural learning in chronic medicated  
638 schizophrenia is related to specific sleep stages. *J Psychiatr Res* 44(2), 112-120. doi:  
639 10.1016/j.jpsychires.2009.06.011.
- 640 Maquet, P., Laureys, S., Peigneux, P., Fuchs, S., Petiau, C., Phillips, C., et al. (2000).  
641 Experience-dependent changes in cerebral activation during human REM sleep. *Nat*  
642 *Neurosci* 3(8), 831-836. doi: 10.1038/77744.
- 643 Mascetti, L., Muto, V., Matarazzo, L., Foret, A., Ziegler, E., Albouy, G., et al. (2013). The  
644 impact of visual perceptual learning on sleep and local slow-wave initiation. *J Neurosci*  
645 33(8), 3323-3331. doi: 10.1523/JNEUROSCI.0763-12.2013.
- 646 Matarazzo, L., Franko, E., Maquet, P., and Vogels, R. (2008). Offline processing of memories  
647 induced by perceptual visual learning during subsequent wakefulness and sleep: A  
648 behavioral study. *J Vis* 8(4), 7 1-9. doi: 10.1167/8.4.7.
- 649 McDevitt, E.A., Rokem, A., Silver, M.A., and Mednick, S.C. (2014). Sex differences in sleep-  
650 dependent perceptual learning. *Vision Res* 99, 172-179. doi: 10.1016/j.visres.2013.10.009.
- 651 Mednick, S., Nakayama, K., and Stickgold, R. (2003). Sleep-dependent learning: a nap is as  
652 good as a night. *Nat Neurosci* 6(7), 697-698. doi: 10.1038/nn1078.
- 653 Monk, T.H., Buysse, D.J., Reynolds, C.F., 3rd, and Kupfer, D.J. (1996). Circadian determinants  
654 of the postlunch dip in performance. *Chronobiol Int* 13(2), 123-133. doi:  
655 10.3109/07420529609037076

- 656 Morin, C.M., Bootzin, R.R., Buysse, D.J., Edinger, J.D., Espie, C.A., and Lichstein, K.L. (2006).  
657 Psychological and behavioral treatment of insomnia: update of the recent evidence (1998-  
658 2004). *Sleep* 29(11), 1398-1414.
- 659 Morin, C.M., Hauri, P.J., Espie, C.A., Spielman, A.J., Buysse, D.J., and Bootzin, R.R. (1999).  
660 Nonpharmacologic treatment of chronic insomnia. An American Academy of Sleep  
661 Medicine review. *Sleep* 22(8), 1134-1156.
- 662 Newsome, W.T., and Pare, E.B. (1988). A selective impairment of motion perception following  
663 lesions of the middle temporal visual area (MT). *J Neurosci* 8(6), 2201-2211.
- 664 Nishida, M., and Walker, M.P. (2007). Daytime naps, motor memory consolidation and  
665 regionally specific sleep spindles. *PLoS One* 2(4), e341. doi:  
666 10.1371/journal.pone.0000341.
- 667 Nobili, L., Baglietto, M.G., De Carli, F., Savoini, M., Schiavi, G., Zanotto, E., et al. (1999). A  
668 quantified analysis of sleep electroencephalography in anorectic adolescents. *Biol*  
669 *Psychiatry* 45(6), 771-775. doi: 10.1016/s0006-3223(98)00107-3.
- 670 Oldfield, R.C. (1971). The assessment and analysis of handedness: the Edinburgh inventory.  
671 *Neuropsychologia* 9(1), 97-113.
- 672 Rasch, B., and Born, J. (2013). About sleep's role in memory. *Physiol Rev* 93(2), 681-766. doi:  
673 10.1152/physrev.00032.2012.
- 674 Rechtschaffen, A., and Kales, A. (1968). *A Manual of Standardized Terminology, Techniques,*  
675 *and Scoring System for Sleep Stages of Human Subjects*. Washington, DC: Public Health  
676 Service, US Government Printing Office.
- 677 Rees, G., Friston, K., and Koch, C. (2000). A direct quantitative relationship between the  
678 functional properties of human and macaque V5. *Nat Neurosci* 3(7), 716-723. doi:  
679 10.1038/76673.
- 680 Regan, D., and Beverley, K.I. (1985). Postadaptation orientation discrimination. *J Opt Soc Am A*  
681 2(2), 147-155.
- 682 Rosanova, M., and Ulrich, D. (2005). Pattern-specific associative long-term potentiation induced  
683 by a sleep spindle-related spike train. *J Neurosci* 25(41), 9398-9405. doi:  
684 10.1523/JNEUROSCI.2149-05.2005.
- 685 Sagi, D. (2011). Perceptual learning in Vision Research. *Vision Res* 51(13), 1552-1566. doi:  
686 10.1016/j.visres.2010.10.019.
- 687 Sasaki, Y., Nanez, J.E., and Watanabe, T. (2010). Advances in visual perceptual learning and  
688 plasticity. *Nat Rev Neurosci* 11(1), 53-60. doi: 10.1038/nrn2737.
- 689 Schabus, M., Gruber, G., Parapatics, S., Sauter, C., Klosch, G., Anderer, P., et al. (2004). Sleep  
690 spindles and their significance for declarative memory consolidation. *Sleep* 27(8), 1479-  
691 1485.
- 692 Schoups, A., Vogels, R., Qian, N., and Orban, G. (2001). Practising orientation identification  
693 improves orientation coding in V1 neurons. *Nature* 412(6846), 549-553.
- 694 Schwartz, S., Maquet, P., and Frith, C. (2002). Neural correlates of perceptual learning: a  
695 functional MRI study of visual texture discrimination. *Proc Natl Acad Sci U S A* 99(26),  
696 17137-17142. doi: 10.1073/pnas.242414599.
- 697 Seeck, M., Koessler, L., Bast, T., Leijten, F., Michel, C., Baumgartner, C., et al. (2017). The  
698 standardized EEG electrode array of the IFCN. *Clin Neurophysiol* 128(10), 2070-2077.  
699 doi: 10.1016/j.clinph.2017.06.254.

- 700 Seitz, A.R., Yamagishi, N., Werner, B., Goda, N., Kawato, M., and Watanabe, T. (2005). Task-  
701 specific disruption of perceptual learning. *Proc Natl Acad Sci U S A* 102(41), 14895-  
702 14900. doi: 10.1073/pnas.0505765102.
- 703 Sejnowski, T.J., and Destexhe, A. (2000). Why do we sleep? *Brain Res* 886(1-2), 208-223. doi:  
704 10.1016/s0006-8993(00)03007-9
- 705 Sharbrough, F.C.G.E., Lesser, R.P., Lüders, H., Nuwer, M., and Picton, T.W. (1991). American  
706 electroencephalographic society guidelines for standard electrode position nomenclature.  
707 *J. Clin. Neurophysiol.* 8(2), 200-202.
- 708 Shibata, K., Sasaki, Y., Bang, J.W., Walsh, E.G., Machizawa, M.G., Tamaki, M., et al. (2017).  
709 Overlearning hyperstabilizes a skill by rapidly making neurochemical processing  
710 inhibitory-dominant. *Nat Neurosci* 20(3), 470-475. doi: 10.1038/nn.4490.
- 711 Stickgold, R. (2005). Sleep-dependent memory consolidation. *Nature* 437(7063), 1272-1278.  
712 doi: 10.1038/nature04286.
- 713 Stickgold, R., James, L., and Hobson, J.A. (2000a). Visual discrimination learning requires sleep  
714 after training. *Nat Neurosci* 3(12), 1237-1238. doi: 10.1038/81756.
- 715 Stickgold, R., Whidbee, D., Schirmer, B., Patel, V., and Hobson, J.A. (2000b). Visual  
716 discrimination task improvement: A multi-step process occurring during sleep. *J Cogn*  
717 *Neurosci* 12(2), 246-254. doi: 10.1162/089892900562075.
- 718 Tamaki, M., Bang, J.W., Watanabe, T., and Sasaki, Y. (2014). The first-night effect suppresses  
719 the strength of slow-wave activity originating in the visual areas during sleep. *Vision Res*  
720 99, 154-161. doi: 10.1016/j.visres.2013.10.023.
- 721 Tamaki, M., Bang, J.W., Watanabe, T., and Sasaki, Y. (2016). Night watch in one brain  
722 hemisphere during sleep associated with the first-night effect in humans. *Curr Biol* 26(9),  
723 1190-1194. doi: 10.1016/j.cub.2016.02.063.
- 724 Tamaki, M., Huang, T.R., Yotsumoto, Y., Hamalainen, M., Lin, F.H., Nanez, J.E., Sr., et al.  
725 (2013). Enhanced spontaneous oscillations in the supplementary motor area are  
726 associated with sleep-dependent offline learning of finger-tapping motor-sequence task. *J*  
727 *Neurosci* 33(34), 13894-13902. doi: 10.1523/JNEUROSCI.1198-13.2013.
- 728 Tamaki, M., Matsuoka, T., Nittono, H., and Hori, T. (2008). Fast sleep spindle (13-15 Hz)  
729 activity correlates with sleep-dependent improvement in visuomotor performance. *Sleep*  
730 31(2), 204-211.
- 731 Tamaki, M., Nittono, H., Hayashi, M., and Hori, T. (2005). Examination of the first-night effect  
732 during the sleep-onset period. *Sleep* 28(2), 195-202.
- 733 Tamminen, J., Payne, J.D., Stickgold, R., Wamsley, E.J., and Gaskell, M.G. (2010). Sleep  
734 spindle activity is associated with the integration of new memories and existing  
735 knowledge. *J Neurosci* 30(43), 14356-14360. doi: 10.1523/JNEUROSCI.3028-10.2010.
- 736 Thut, G., Nietzel, A., Brandt, S.A., and Pascual-Leone, A. (2006). Alpha-band  
737 electroencephalographic activity over occipital cortex indexes visuospatial attention bias  
738 and predicts visual target detection. *J Neurosci* 26(37), 9494-9502. doi:  
739 10.1523/JNEUROSCI.0875-06.2006.
- 740 Tononi, G., and Cirelli, C. (2014). Sleep and the price of plasticity: from synaptic and cellular  
741 homeostasis to memory consolidation and integration. *Neuron* 81(1), 12-34. doi:  
742 10.1016/j.neuron.2013.12.025.
- 743 Viemose, I., Moller, P., Laugesen, J.L., Schachtman, T.R., Manoharan, T., and Christoffersen,  
744 G.R. (2013). Appetitive long-term taste conditioning enhances human visually evoked  
745 EEG responses. *Behav Brain Res* 253, 1-8. doi: 10.1016/j.bbr.2013.06.033.

- 746 Walker, M.P. (2005). A refined model of sleep and the time course of memory formation. *Behav*  
747 *Brain Sci* 28(1), 51-64; discussion 64-104.
- 748 Walker, M.P., Brakefield, T., Morgan, A., Hobson, J.A., and Stickgold, R. (2002). Practice with  
749 sleep makes perfect: sleep-dependent motor skill learning. *Neuron* 35(1), 205-211. doi:  
750 10.1016/s0896-6273(02)00746-8.
- 751 Walker, M.P., and Stickgold, R. (2005). It's practice, with sleep, that makes perfect: implications  
752 of sleep-dependent learning and plasticity for skill performance. *Clin Sports Med* 24(2),  
753 301-317, ix. doi: 10.1016/j.csm.2004.11.002.
- 754 Walker, M.P., Stickgold, R., Jolesz, F.A., and Yoo, S.S. (2005). The functional anatomy of  
755 sleep-dependent visual skill learning. *Cereb Cortex* 15(11), 1666-1675. doi:  
756 10.1093/cercor/bhi043.
- 757 Xiao, L.Q., Zhang, J.Y., Wang, R., Klein, S.A., Levi, D.M., and Yu, C. (2008). Complete  
758 transfer of perceptual learning across retinal locations enabled by double training. *Curr*  
759 *Biol* 18(24), 1922-1926. doi: 10.1016/j.cub.2008.10.030.
- 760 Yotsumoto, Y., Chang, L.H., Watanabe, T., and Sasaki, Y. (2009a). Interference and feature  
761 specificity in visual perceptual learning. *Vision Res* 49(21), 2611-2623. doi:  
762 10.1016/j.visres.2009.08.001.
- 763 Yotsumoto, Y., Sasaki, Y., Chan, P., Vasios, C.E., Bonmassar, G., Ito, N., et al. (2009b).  
764 Location-specific cortical activation changes during sleep after training for perceptual  
765 learning. *Curr Biol* 19(15), 1278-1282. doi: 10.1016/j.cub.2009.06.011.
- 766 Zhang, J.Y., Zhang, G.L., Xiao, L.Q., Klein, S.A., Levi, D.M., and Yu, C. (2010). Rule-based  
767 learning explains visual perceptual learning and its specificity and transfer. *J Neurosci*  
768 30(37), 12323-12328. doi: 10.1523/JNEUROSCI.0704-10.2010.
- 769
- 770
- 771



772 **Table legends**

773

774 **Table 1.** **SOL**, sleep-onset latency. **WASO**, wake time after sleep onset. **SE**, sleep efficiency.

775 **TIB**, the time in bed which indicates the duration of each sleep session (the time interval

776 between lights-off and lights-on)

777

778 **Table 2.** The MEQ score was measured by the Morningness-Eveningness Questionnaire (MEQ).

779 Other parameters were measured using the Pittsburg Sleep Quality Index questionnaire (PSQI).

780

781

---

**Table 1. Sleep parameters for Experiment 2**

---

|                 | Mean ± SEM  |
|-----------------|-------------|
| Stage W (min)   | 21.4 ± 5.61 |
| Stage N1 (min)  | 11.2 ± 2.45 |
| Stage N2 (min)  | 25.3 ± 4.03 |
| Stage N3 (min)  | 18.0 ± 5.30 |
| REM sleep (min) | 5.4 ± 2.61  |
| SOL (min)       | 11.0 ± 3.84 |
| WASO (min)      | 14.2 ± 4.76 |
| SE (%)          | 73.6 ± 7.45 |
| TIB (min)       | 85.2 ± 1.96 |

---

---

**Table 2. Habitual sleep parameters**

---

|                               | Mean ± SEM   |
|-------------------------------|--------------|
| Bedtime                       | 23:16 ± 0:09 |
| Wake-up time                  | 7:42 ± 0:16  |
| Sleep duration                | 7.8 ± 0.20   |
| Sleep onset latency           | 11.9 ± 2.57  |
| Habitual sleep efficiency (%) | 92.8 ± 2.25  |
| The global PSQI score         | 2.7 ± 0.37   |
| The MEQ score                 | 55.2 ± 2.63  |

---

782 **Figure legends**

783

784 **Fig. 1.** Experimental Designs and the Gabor orientation task. **(A)** Experiment 1. **(B)** Experiment  
785 2. **(C)** Schematic illustration of one trial of the Gabor orientation task.

786

787 **Fig. 2.** The mean performance improvement ( $\pm$ SEM) at post-interval test session for the sleep  
788 and the wake groups in Experiment 1. See the main text for the results of ANOVA. Asterisks  
789 (\*\*) indicate that post-hoc t-tests (one sample t-test and a paired t-test) showed significance at  
790  $p < .01$ . FDR applied (see the main text for details).

791

792 **Fig. 3.** The mean performance improvement ( $\pm$ SEM) at post-interval test session for Experiment  
793 2.  $N=9$ . Paired and one-sample t-tests,  $*p < .05$ . See main test for more details of statistical results.

794

795 **Fig. 4.** Correlation between the offline performance gains and trained-region specific sigma  
796 activity during NREM sleep.  $N=9$ .  $**p < .01$ . No outliers detected by the Grubb's test.

797

**Figure 1**

**A**

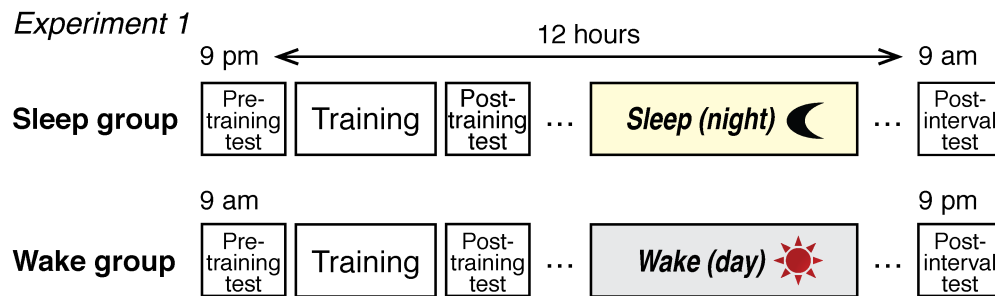

**B**

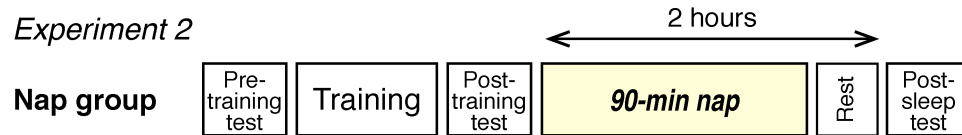

**C**

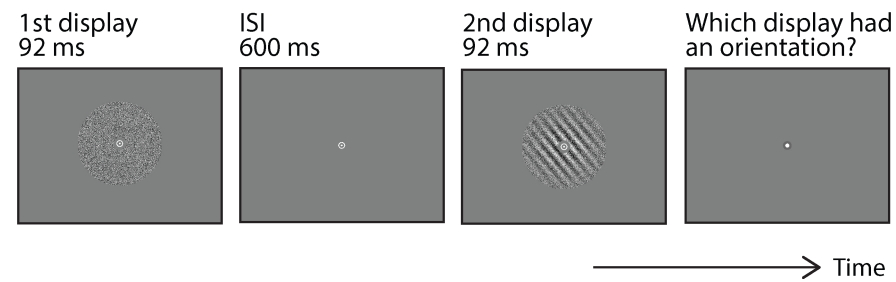

**Figure 2**

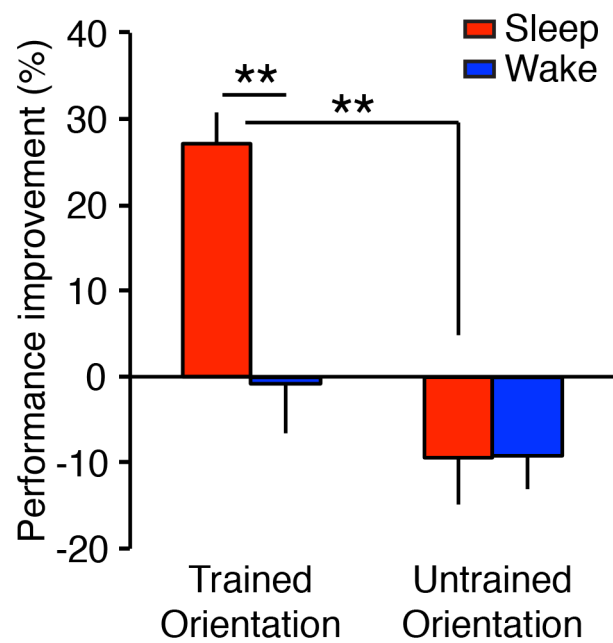

**Figure 3**

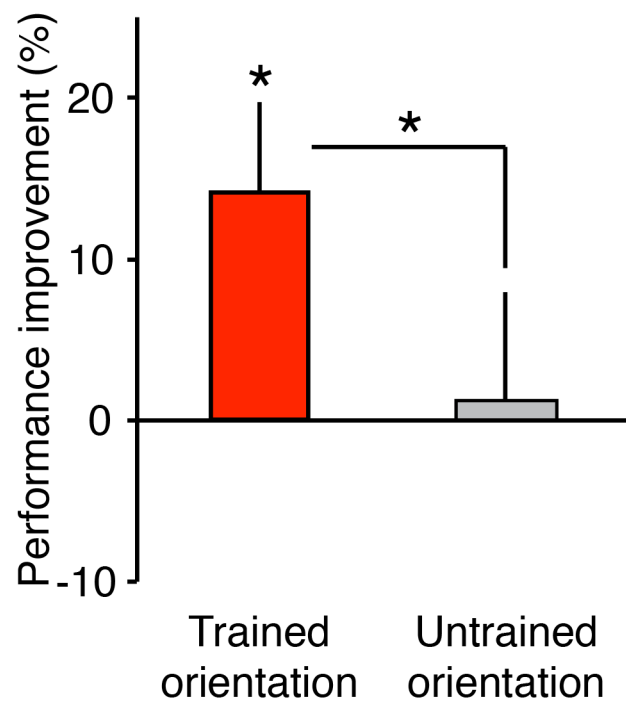

**Figure 4**

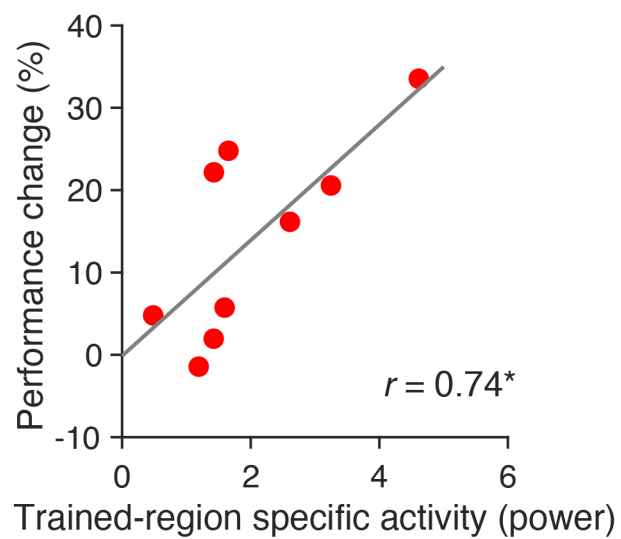

Source: http://biorxiv.org/content/10.1101/429761v1.full.pdf
